# Supplementary material for: Polymorphisms in Protamine 1 and Protamine 2 predict the risk of male infertility: a meta-analysis
Source: PubMed Central journal article supplement (PMC4607923; doi:10.1038/srep15300), 2015-10-16
Supplement: srep15300-s1.pdf [file srep15300-s1.pdf]

Polymorphisms in Protamine 1 and Protamine 2 predict the risk of male infertility: a  
meta-analysis

Weijun Jiang<sup>1,+</sup>, Hui Sun<sup>2,+</sup>, Jing Zhang<sup>1</sup>, Qing Zhou<sup>1</sup>, Qiuyue Wu<sup>1</sup>, Tianfu Li<sup>1</sup>, Cui Zhang<sup>1</sup>,  
Weiwei Li<sup>1</sup>, Mingchao Zhang<sup>1</sup> and Xinyi Xia<sup>1,\*</sup>

<sup>1</sup>Department of Reproduction and Genetics, Institute of Laboratory Medicine, Jinling  
Hospital, Nanjing University School of Medicine, Nanjing 210002, P.R. China

<sup>2</sup>Department of Diagnostic Ultrasound, Jinling Hospital, Nanjing University School of  
Medicine, Nanjing 210002, P.R. China

Email addresses:

WJJ: 1048281756@qq.com

<sup>+</sup>HS: fmmusunhui@sina.com

JZ: 710081649@qq.com

QZ: 863840726@qq.com

QYW: 475626760@qq.com

TFL: talentli13@163.com

CZ: 841479480@qq.com

WWL: eeeeet@sina.com

MCZ: zmchj99@163.com

\*XYX: xiaxynju@163.com

\* Correspondence Author

<sup>+</sup> The authors contributed equally to this work

## **Figure legends:**

**Supplementary Figure S1. Meta-analysis of the rs737008 polymorphism and male infertility risk. (A) Heterozygous model. (B) Homozygous model. (C) Dominant model. (D) Recessive model. OR, odds ratio; CI, confidence interval.**

**Supplementary Figure S2. Meta-analysis of the rs2301365 polymorphism and male infertility risk. (A) Ethnic subgroup analysis in heterozygous model. (B) Ethnic subgroup analysis in dominant model. (C) Control source subgroup analysis in heterozygous model. (D) Control source subgroup analysis in dominant model. OR, odds ratio; CI, confidence interval.**

**Supplementary Figure S3. Meta-analysis of the rs2301365 polymorphism and male infertility risk in allele model. (A) Overall group analysis. (B) Ethnic subgroup analysis. (C) Method subgroup analysis. (D) Control source subgroup analysis. OR, odds ratio; CI, confidence interval.**

**Supplementary Figure S4. Meta-analysis of the rs1646022 polymorphism and male infertility risk under allele model in control source subgroup analysis. OR, odds ratio; CI, confidence interval.**

# Supplementary Figure S1

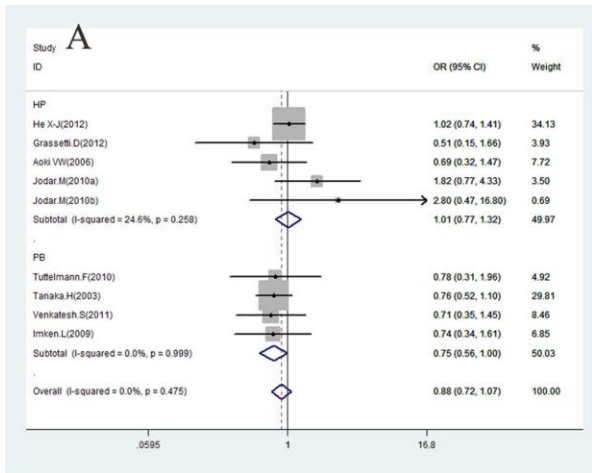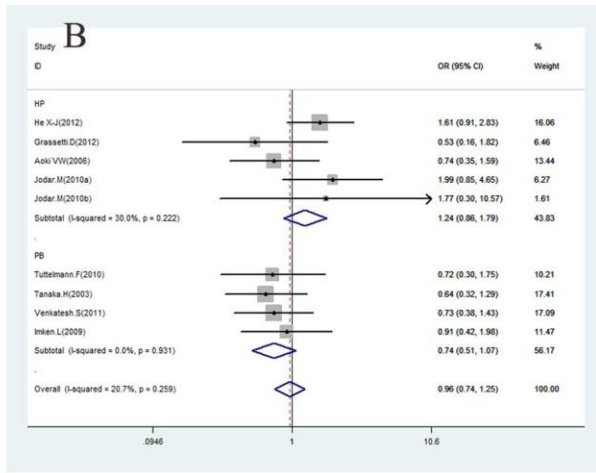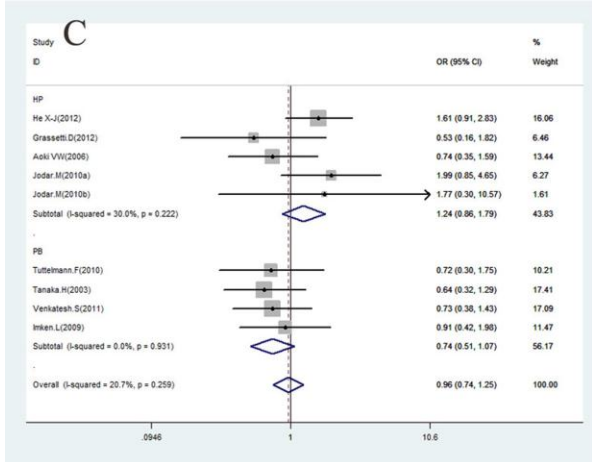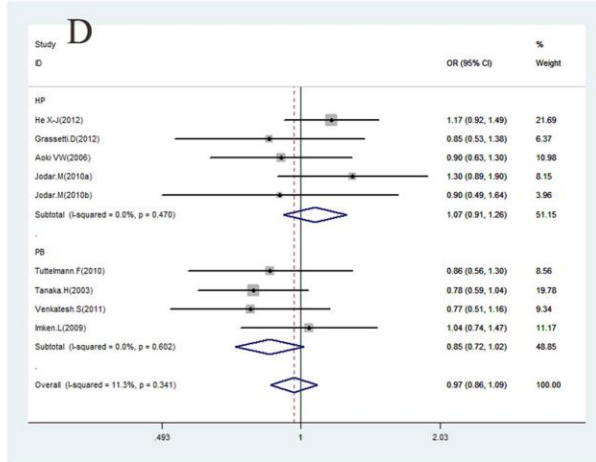

# Supplementary Figure S2

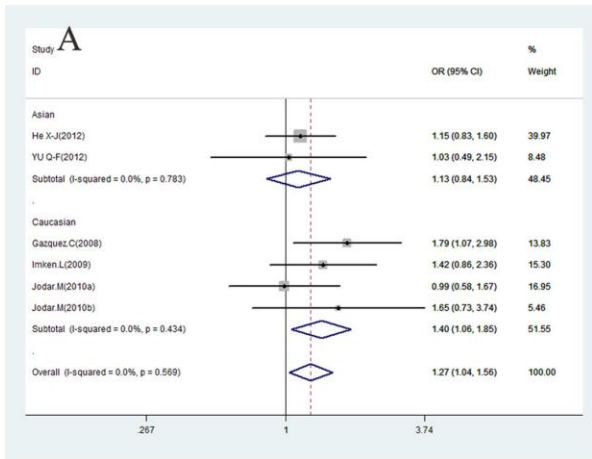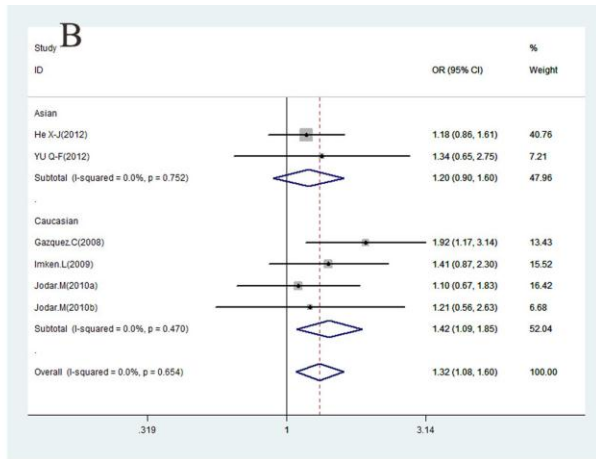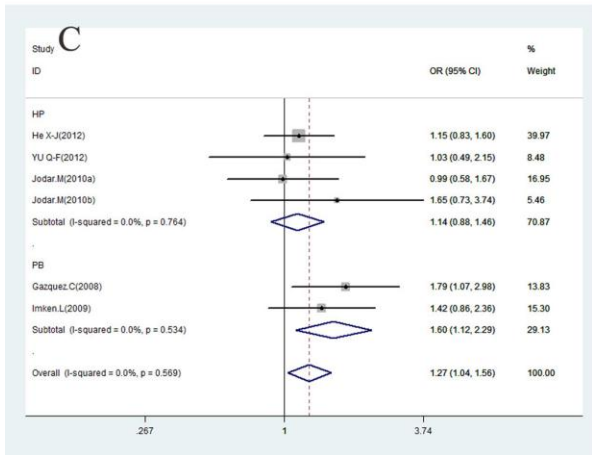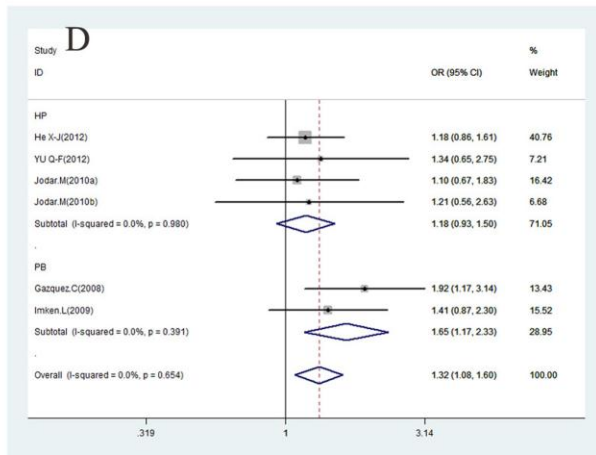

# Supplementary Figure S3

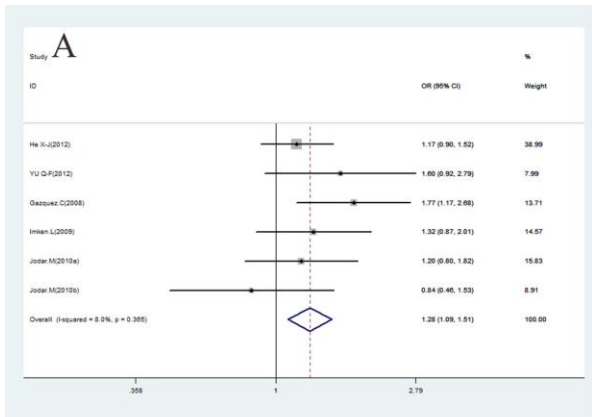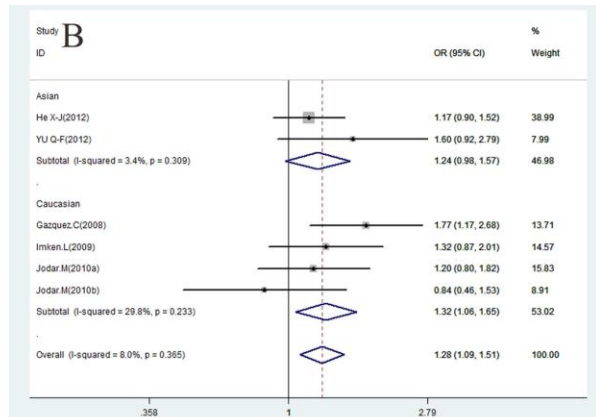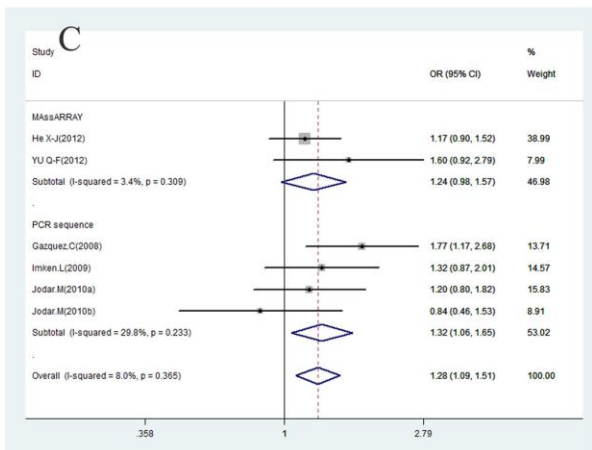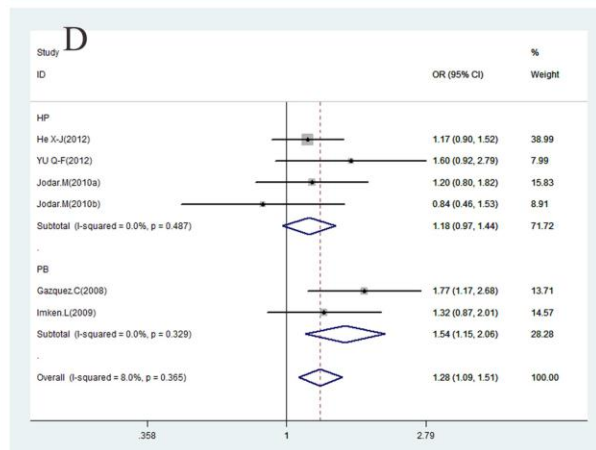

## Supplementary Figure S4

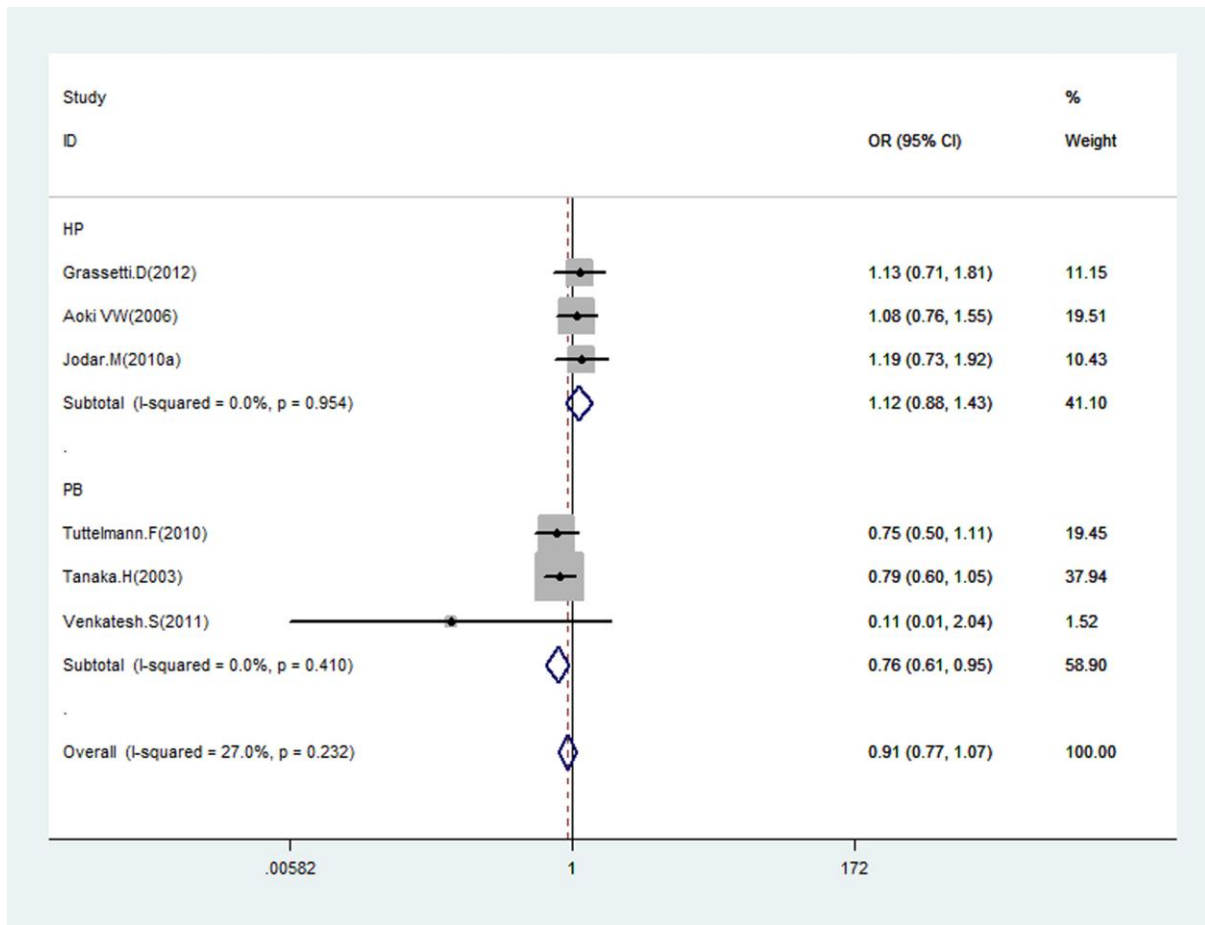

**Supplementary Table S1. Main characteristics of all studies on the genotype of rs35576928 included in the meta-analysis**

| First author (year) | Country | Ethnicity | Method       | Control source | Cases/<br>Controls | Case |    |    | Control |    |    | Case         |            | Control       |            | $P_{HWE}$ | MAF   |
|---------------------|---------|-----------|--------------|----------------|--------------------|------|----|----|---------|----|----|--------------|------------|---------------|------------|-----------|-------|
|                     |         |           |              |                |                    | GG   | GT | TT | GG      | GT | TT | G (%)        | T (%)      | G (%)         | T (%)      |           |       |
| He XJ(2012)         | China   | Asian     | Others       | HP             | 303/373            | 256  | 47 | 0  | 328     | 45 | 0  | 559 (92.24%) | 47 (7.76%) | 701 (93.97%)  | 45 (6.03%) | 0.215     | 0.983 |
| Grasseti D(2012)    | Italy   | Caucasian | PCR sequence | HP             | 110/53             | 110  | 0  | 0  | 52      | 1  | 0  | 220 (100%)   | 0 (0%)     | 105 (99.06%)  | 1 (0.04%)  | 0.945     |       |
| Tuttelmann F (2010) | Germany | Caucasian | PCR sequence | PB             | 171/77             | 167  | 4  | 0  | 75      | 2  | 0  | 338 (98.83%) | 4 (1.17%)  | 52 (98.7%)    | 2 (1.3%)   | 0.908     |       |
| Kichine E(2008)     | France  | Caucasian | Others       | PB             | 300/672            | 300  | 0  | 0  | 670     | 2  | 0  | 600 (100%)   | 0 (0%)     | 1342 (99.85%) | 2 (0.15%)  | 0.969     |       |
| Aoki VW(2006)       | America | Caucasian | PCR sequence | HP             | 192/96             | 189  | 3  | 0  | 94      | 2  | 0  | 381 (99.22%) | 3 (0.78%)  | 190 (98.96%)  | 2 (1.04%)  | 0.918     |       |
| Iguchi N(2006)      | America | Caucasian | MIX          | HP             | 30/10              | 27   | 3  | 0  | 9       | 1  | 0  | 57 (95%)     | 3 (5%)     | 19 (95%)      | 1 (5%)     | 0.868     |       |
| Ravel C(2007)       | France  | MIX       | MIX          | HP             | 281/111            | 269  | 2  | 0  | 111     | 0  | 0  | 561 (99.82%) | 1 (0.18%)  | 222 (100%)    | 0 (0%)     | 1         |       |
| Jodar M(2010a)      | Spain   | Caucasian | PCR sequence | HP             | 156/102            | 155  | 1  | 0  | 102     | 0  | 0  | 311 (99.68%) | 1 (0.32%)  | 204 (100%)    | 0 (0%)     | 1         |       |
| Jodar (2010b)       | Sweden  | Caucasian | PCR sequence | HP             | 53/50              | 52   | 1  | 0  | 49      | 1  | 0  | 105 (99.06%) | 1 (0.94%)  | 99 (99%)      | 1 (1%)     | 0.943     |       |

HP, hospital population; PB, population based

PCR-RFLP, polymerase chain reaction-restriction fragment length polymorphism; MIX, complete region or PCR sequence and PCR-RFLP; Others,

MassARRAY or PCR-RFLP

$P_{HWE}$ , Value of Hardy-Weinberg equilibrium in the control group

MAF, Minimum allele frequency

**Supplementary Table S2. Main characteristics of all studies on the genotype of rs35262993 included in the meta-analysis**

| First author (year) | Country | Ethnicity | Method                   | Control source | Cases/<br>Controls | Case |    |    | Control |    |    | Case         |           | Control      |           | $P_{HWE}$ | MAF   |
|---------------------|---------|-----------|--------------------------|----------------|--------------------|------|----|----|---------|----|----|--------------|-----------|--------------|-----------|-----------|-------|
|                     |         |           |                          |                |                    | GG   | GA | AA | GG      | GA | AA | G (%)        | A (%)     | G (%)        | A (%)     |           |       |
| He XJ(2012)         | China   | Asian     | MAsARRAY                 | HP             | 293/374            | 292  | 1  | 0  | 373     | 1  | 0  | 585 (99.83%) | 1 (0.17%) | 747 (99.87%) | 1 (0.13%) | 0.979     | 0.008 |
| Grassetti D(2012)   | Italy   | Caucasian | PCR sequence             | HP             | 110/53             | 109  | 1  | 0  | 53      | 0  | 0  | 219 (99.55%) | 1 (0.45%) | 106 (100%)   | 0 (0%)    | 1         |       |
| Tuttelmann F(2010)  | Germany | Caucasian | PCR sequence             | PB             | 171/77             | 167  | 4  | 0  | 75      | 2  | 0  | 338 (98.83%) | 4 (1.17%) | 152 (98.70%) | 2 (1.30%) | 0.908     |       |
| Aoki VW(2006)       | America | Caucasian | PCR sequence             | HP             | 192/96             | 189  | 3  | 0  | 94      | 2  | 0  | 381 (99.22%) | 3 (0.78%) | 190 (98.96%) | 2 (1.04%) | 0.919     |       |
| Ravel C(2007)       | France  | MIX       | PCR-RFLP<br>and sequence | HP             | 281/111            | 281  | 0  | 0  | 111     | 0  | 0  | 562 (100%)   | 0 (0%)    | 222 (100%)   | 0 (0%)    | 1         |       |
| Imken L(2009)       | Morocco | Caucasian | PCR sequence             | PB             | 135/160            | 133  | 2  | 0  | 155     | 5  | 0  | 268 (99.26%) | 2 (0.74%) | 315 (98.44%) | 5 (1.56%) | 0.841     |       |

PCR sequence, polymerase chain reaction and sequencing; PCR-RFLP, polymerase chain reaction-restriction fragment length polymorphism; Others, MassARRAY or PCR-RFLP and PCR sequence

MIX, complete region

HP, hospital population; PB, population based

$P_{HWE}$ , Value of Hardy-Weinberg equilibrium in the control group

MAF, Minimum allele frequency



**Supplementary Table S3. Main characteristics of all studies on the genotype of rs2070923 included in the meta-analysis**

| First author (year) | Country | Ethnicity | Method       | Control source | Cases/<br>Controls | Case |     |    | Control |     |    | Case         |              | Control      |              | $P_{HWE}$ | MAF   |
|---------------------|---------|-----------|--------------|----------------|--------------------|------|-----|----|---------|-----|----|--------------|--------------|--------------|--------------|-----------|-------|
|                     |         |           |              |                |                    | AA   | AC  | CC | AA      | AC  | CC | A (%)        | C (%)        | A (%)        | C (%)        |           |       |
| He XJ(2012)         | China   | Asian     | MassARRAY    | HP             | 306/376            | 162  | 113 | 31 | 204     | 146 | 26 | 437 (71.41%) | 175 (28.59%) | 554 (73.67%) | 198 (26.33%) | 0.986     | 0.717 |
| Grassetti D(2012)   | Italy   | Caucasian | PCR sequence | HP             | 110/53             | 14   | 54  | 42 | 5       | 25  | 23 | 82 (37.27%)  | 138 (62.73%) | 35 (33.02%)  | 71 (66.98%)  | 0.629     |       |
| Tuttelmann F(2010)  | Germany | Caucasian | PCR sequence | PB             | 159/73             | 26   | 55  | 78 | 9       | 26  | 38 | 107 (33.65%) | 211 (66.35%) | 44 (30.14%)  | 102 (69.86%) | 0.188     |       |
| Aoki VW(2006)       | America | Caucasian | PCR sequence | HP             | 192/96             | 27   | 72  | 93 | 12      | 44  | 40 | 126 (32.81%) | 258 (67.19%) | 68 (35.42%)  | 124 (64.58%) | 0.985     |       |
| Tanaka H(2003)      | Japan   | Asian     | PCR sequence | PB             | 226/270            | 125  | 82  | 19 | 127     | 118 | 25 | 332 (73.45%) | 120 (26.55%) | 372 (68.89%) | 168 (31.11%) | 0.748     |       |
| Venkatesh S(2011)   | India   | Asian     | PCR sequence | PB             | 100/100            | 25   | 20  | 55 | 40      | 0   | 60 | 70 (35.00%)  | 130 (65.00%) | 80 (40.00%)  | 120 (60.00%) | 0         |       |
| Jodar M(2010a)      | Spain   | Caucasian | PCR sequence | HP             | 111/50             | 8    | 39  | 64 | 5       | 23  | 22 | 55 (24.77%)  | 167 (75.23%) | 33 (33.00%)  | 67 (67.00%)  | 0.776     |       |

PCR sequence, polymerase chain reaction and sequencing

HP, hospital population; PB, population based

$P_{HWE}$ , Value of Hardy-Weinberg equilibrium in the control group

MAF, Minimum allele frequency
